# Increase in scrotal temperature in laptop computer users

Yefim Sheynkin<sup>1,2</sup>, Michael Jung<sup>1</sup>, Peter Yoo<sup>1</sup>, David Schulsinger<sup>1</sup> and Eugene Komaroff<sup>3</sup>

<sup>1</sup>Department of Urology and <sup>3</sup>General Clinical Research Center, State University of New York at Stony Brook, Stony Brook NY 11794-8093, USA

<sup>2</sup>To whom correspondence should be addressed at: Department of Urology, SUNY at Stony Brook, HSC level 9 room 040, Stony Brook NY 11794-8093, USA. E-mail: ysheynkin@notes.cc.sunysb.edu

**BACKGROUND:** Scrotal hyperthermia has been identified as a risk factor for male infertility. Laptop computers (LC) have become part of a contemporary lifestyle and have gained popularity among the younger population of reproductive age. LC are known to reach high internal operating temperatures. We evaluated the thermal effect of LC on the scrotum. **METHODS:** Right and left scrotal temperature (ScT) was measured in 29 healthy volunteers in two separate 60 min sessions. ScT was recorded from thermocouples on a digital datalogger every 3 min with the working LC in a laptop position and in the same sitting position with approximated thighs without LC. **RESULTS:** ScT increased significantly on the right and left side in the group with working LC (2.8°C and 2.6°C, respectively;  $P < 0.001$ ) and without LC (2.1°C,  $P < 0.0001$ ). However, ScT elevation with working LC was significantly higher ( $P < 0.0001$ ). **CONCLUSIONS:** Working LC in a laptop position causes significant ScT elevation as a result of heat exposure and posture-related effects. Long-term exposure to LC-related repetitive transient scrotal hyperthermia is a modern lifestyle feature that may have a negative impact upon spermatogenesis, specifically in teenage boys and young men. Further studies of such thermal effects on male reproductive health are warranted.

## Introduction

It has been estimated that 15–20% of couples attempting to achieve pregnancy are unable to conceive. A male factor is the main single diagnostic category in more than half of them (Gilbaugh and Lipshultz, 1994). Gradual decline in sperm production in men has become a growing concern and subject of widespread debates in the last decades (Carlsen *et al.*, 1992; Olsen *et al.*, 1995; Fisch *et al.*, 1996; Lerchl and Nieschlag, 1996; Swan *et al.*, 1997; Jegou *et al.*, 1999). Several factors have been implicated as possible causes of the deterioration of the male reproductive function, including endocrine disrupters, changes in lifestyle and exposure to heat (Figa-Talamanca *et al.*, 1992; Mieusset and Bujan, 1995; Toppari *et al.*, 1996; Thonneau *et al.*, 1998; Bujan *et al.*, 2000; Rozati *et al.*, 2002).

Testicular function is temperature dependent and requires a temperature 2–4°C below body temperature (Thonneau *et al.*, 1998). Elevated testicular temperature is a well-documented mechanism of abnormal spermatogenesis in common diseases associated with male infertility, e.g. varicocele, undescended testis (Mieusset *et al.*, 1985; Goldstein and Eid, 1989; Lerchl *et al.*, 1993; Wright *et al.*, 1997).

Numerous factors can elevate scrotal temperature either by whole body or local scrotal heating. Elevated scrotal temperature was found in men with febrile illness, retractile testes, occupations associated with high temperature exposure, hot bath and sauna users, men wearing tight jockey

shorts and suspensories, car drivers (Mills, 1919; MacLeod, 1951; Kapadia and Phadke, 1955; Robinson and Rock, 1967; Brindley, 1982; Brown-Woodman *et al.*, 1984; Nistal and Paniagua, 1984; Rubben *et al.*, 1986; Figa-Talamanca *et al.*, 1992; Saikhun *et al.*, 1999; Bujan *et al.*, 2000). Multiple human studies have confirmed deleterious effects of scrotal hyperthermia on spermatogenesis (Rock and Robinson, 1965; Robinson *et al.*, 1968; Mieusset and Bujan, 1995; Kandeel and Swerdloff, 1988).

Local scrotal hyperthermia can be achieved by direct heat exposure or effect of body temperature and blunted physiological testicular cooling mechanism (Kapadia and Phadke, 1955; Robinson and Rock, 1967; Brindley, 1982). These factors have been experimentally studied by various methods including local scrotal hot water bath, direct heating with a 150 Wt electric light bulb, sitting position with thighs approximated to the scrotum, and scrotal insulation (Rock and Robinson, 1965; Robinson *et al.*, 1968; Brindley, 1982). Recently potential exposure of male reproductive function to certain lifestyle factors (sedentary work position, prolonged car driving, wearing plastic lined diapers by children) has been linked to increased scrotal temperature and delayed conception (Bujan *et al.*, 2000; Hjollund *et al.*, 2000, 2002a; Partsch *et al.*, 2000).

Continued improvements in power, size and price of LC have favored their increased use in a younger population of reproductive age. However, LC actively generate heat and can

reach internal operating temperature  $>70^{\circ}\text{C}$ . Frequently positioned close to the scrotum, this device is capable of producing direct local heat exposure. In addition, the use of a LC requires a special body position in order to balance the computer on a lap when the scrotum is trapped between closely approximated thighs.

With the exception of an anecdotal report of penile and scrotal burns after LC use (Ostenson, 2002), the effect of portable computers in a laptop position on scrotal temperature is not known. We performed the first study to investigate scrotal temperature changes in LC users.

## Materials and methods

Twenty-nine healthy male volunteers, 21 to 35 years old (median age 24) were recruited. All subjects completed the study. The study was approved by the Institutional Review Board and conducted at the General Clinical Research Center. All men signed an informed consent form, completed a health questionnaire and underwent a physical exam. Exclusion criteria included history or presence of varicocele, cryptorchidism, scrotal surgery, skin disease, infertility, testicular size discrepancy, recent febrile illness and prolonged or occupational exposure to heat (e.g. sauna or hot bath users, professional drivers, workers exposed to high temperature). Two 1 h sessions of scrotal temperature measurements were performed on different days in the same room with median room temperature of  $22.28^{\circ}\text{C}$  (range  $21.89$ – $22.61^{\circ}\text{C}$ ). Men were dressed in the same casual attire for each session. Sessions with and without LC were conducted at the same time of the day between 8.00 and 16.00 (median time 11.37).

Body temperature was taken orally prior to each session. Each participant spent 15 min standing in the room to adjust to the room temperature before being seated in the chair. Two cutaneous thermocouples (5SRTC-TT J type Teflon insulated wire, Omega Engineering Inc., Stamford, CT; maximum service temperature of  $260^{\circ}\text{C}$ ) were attached to the unshaved scrotal skin anteriorly corresponding to the right and left testis using thin transparent tape to cover the sensor end of the thermocouple. Nonworking LC was positioned on the lap. After the participant adopted the position with approximated thighs necessary to comfortably balance the LC on the lap, the LC was removed. This position was maintained throughout the complete session. The thermocouples were connected to digital thermometer/datalogger HH84 (Omega Engineering Inc., Stamford, CT). Separate measurements of scrotal temperature on the right and left side were recorded in 3 min intervals. The datalogger was calibrated daily.

Two different brand name Pentium 4 LC were used randomly. The LC was turned on for 15 min before being positioned on the lap. Thermocouples were attached the same way and at the same place on the right and left side of the scrotum. Then the LC was comfortably positioned on the lap and the participant adopted and maintained the same sitting posture as at the previous session without the LC. Temperature measurements were performed at 3 min intervals. Measurements of the external bottom surface temperature of the working LC were taken randomly at the same time intervals.

## Statistical analysis

Statistical analysis was carried out in SAS version 8.2 (SAS Institute Inc, Cary, NC). Data are summarized with medians and ranges (min and max) in centigrade units. Wilcoxon signed-ranks tests for two related samples were used to test for differences between scrotal temperatures for each side separately with  $P < 0.05$  considered statistically significant.

## Results

Median body temperature for both sessions was  $37^{\circ}\text{C}$  (range  $36.78$ – $37.01^{\circ}\text{C}$ ). There was no significant difference in median baseline scrotal temperatures of the right and left side between groups with LC and without LC ( $P = 0.075$  and  $P = 0.083$ , respectively). As shown in Figure 1, median left scrotal temperature increased in men with working LC and without LC. Median right scrotal temperature also increased in both groups, although it remained constant in men without LC after 30 min (Figure 2). Scrotal temperature elevation on the right and left side in 60 min was significant in both groups ( $P < 0.0001$ ). However, this temperature elevation (60 min gradient) on the right and left side was significantly higher in the group with working LC compared to the group without LC ( $P < 0.0001$ ; Table I).

The median external bottom surface temperature of the two working LCs increased from  $30.91^{\circ}\text{C}$  ( $29.11$ – $32.56^{\circ}\text{C}$ ) at the beginning of the experiment to  $39.92^{\circ}\text{C}$  ( $39.50$ – $40.28^{\circ}\text{C}$ ) at 60 min. There were no significant differences in the initial ( $P = 0.329$ ) and final external bottom surface temperature ( $P = 0.999$ ) between two LC brands based on Wilcoxon rank sums tests.

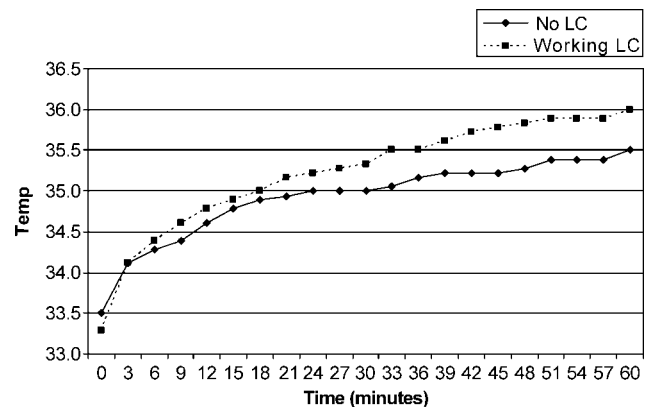

Figure 1. Median left scrotal temperature ( $^{\circ}\text{C}$ ) in men with working LC and without LC.

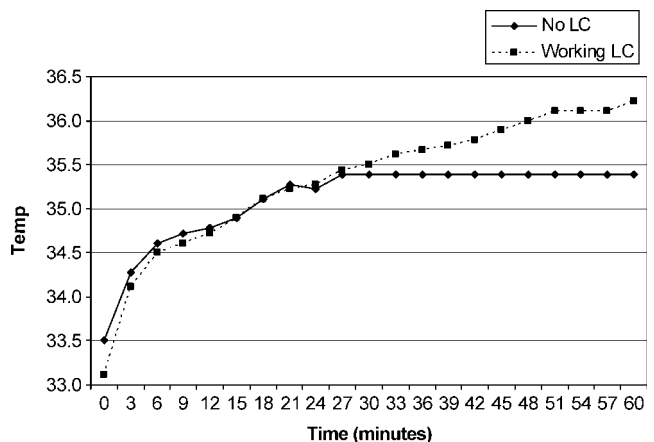

Figure 2. Median right scrotal temperature ( $^{\circ}\text{C}$ ) in men with working LC and without LC.

**Table I.** Median scrotal temperature (°C) with working LC in a laptop position and without LC

| Sessions                        | Side  | 0 min            | 60 min           | 60 min gradient | P-value  |
|---------------------------------|-------|------------------|------------------|-----------------|----------|
| Working LC in a laptop position | Right | 33.1 (32.0–35.2) | 36.2 (35.1–37.5) | 2.8 (1.0–5.1)   | < 0.0001 |
|                                 | Left  | 33.3 (32.3–34.9) | 36.0 (35.4–37.4) | 2.6 (1.4–4.3)   | < 0.0001 |
| Sitting without LC              | Right | 33.5 (31.0–35.3) | 35.4 (33.0–36.9) | 2.1 (–0.1–4.5)  | < 0.0001 |
|                                 | Left  | 33.5 (31.7–35.3) | 35.5 (33.9–36.7) | 2.1 (0.0–3.7)   | < 0.0001 |

## Discussion

The negative effect of exogenous scrotal heat exposure on spermatogenesis has been demonstrated by numerous experimental human and animal studies. Recently, scrotal hyperthermia has been linked to certain lifestyle factors including use of disposable plastic lined diapers in children, prolonged car driving and sedentary work (Bujan *et al.*, 2000; Hjollund *et al.*, 2000, 2002a; Partsch, 2000). Laptop computers have become an integral part of a modern lifestyle. By 2005, LC use in USA will grow to 60 million units, while worldwide usage is predicted to be at 150 million units. Use of LC is growing among teenagers and young men of reproductive age.

Heat remains one of the most critical and unresolved issues in computer design. Frequent use of LC in a laptop position directly exposes the scrotum to the dissipated high internal operating temperature of the machine.

Maintenance of a proper testicular temperature is essential for normal spermatogenesis. Our study demonstrates statistically significant elevation of scrotal temperature in LC users. Since scrotal skin temperature strongly correlates with testicular temperature, such elevation corresponds to a testicular hyperthermia (Kitayama, 1965; Kurz and Goldstein, 1986; Hjollund *et al.*, 2002a). Portable computers in a laptop position produce scrotal hyperthermia by both the direct heating effect of the computer and the sitting position necessary to balance computer on the lap with the scrotum trapped tightly between the thighs. Increased scrotal temperature in a sitting position with thighs together has been reported in previous studies (Rock and Robinson, 1965; Brindley, 1982; Bujan *et al.*, 2000). However, the thermal impact of working LC in a laptop position is significantly higher than positional scrotal hyperthermia itself.

In our study, median left and right side scrotal temperature increase in the group with working LC was 2.6°C and 2.8°C, respectively. The magnitude of scrotal hyperthermia associated with abnormal spermatogenesis is unclear. While an increase in scrotal temperature of 1°C was sufficient to suppress spermatogenesis in some studies, others did not confirm those findings when scrotal temperature rose by 0.8–1°C (Rock and Robinson, 1965; Wang *et al.*, 1997). Higher testicular or scrotal temperature elevation between 1 and 2.9°C was more consistently associated with a sustained and considerable negative effect on spermatogenesis and fertility (Robinson *et al.*, 1968; Zorogniotti and MacLeod, 1973; Mieusset *et al.*, 1985; Shafik, 1991). Therefore, a scrotal temperature increase of more than 1°C above baseline has been suggested as a possible minimal thermal gradient capable of

inhibiting spermatogenesis (Wang *et al.*, 1997; Partsch, 2000). A strong negative association was found between high scrotal temperature and sperm count as well as Inhibin B, which is considered a biochemical marker of spermatogenesis. Sperm concentration decreased by 40% per 1°C increment of median daytime scrotal temperature (Hjollund *et al.*, 2002b). In one animal study, an increase in scrotal temperature resulted in impaired fertility even without any detectable changes in semen analysis (Mieusset *et al.*, 1992).

The frequency and time of heat exposure capable of producing reversible or irreversible changes in human spermatogenesis are not known. Studies of frequency of heat exposure and durability of inhibition of spermatogenesis revealed significant but reversible (within weeks or months) changes after single or multiple short-term scrotal heating (Robinson *et al.*, 1968; Kandeel and Swerdloff, 1988) and total body heating (Procope, 1965; Brown-Woodman *et al.*, 1984). However, LC may produce significant repetitive transient scrotal hyperthermia for years. Insufficient recovery time between heat exposures may cause irreversible or partially reversible changes in male reproductive function. In one study, men exposed to high temperature for 5–7 years were found to have oligoasthenoteratozoospermia, while those exposed for 12–15 years had azoospermia (Dada *et al.*, 2003). Another study of 449 male partners of infertile couples revealed that patients with ‘idiopathic’ oligoasthenoteratozoospermia are more exposed to genital heat stress than normozoospermic men (Jung *et al.*, 2002).

Our study demonstrates that working with a LC produces significant elevation of scrotal temperature. While scientific background suggests a negative impact of scrotal hyperthermia upon spermatogenesis, further studies of this particular type of thermal exposure with LC are warranted. Meanwhile, limited use of LC in a laptop position by teenage boys and young men in reproductive age may be considered, to avoid intermittent scrotal heat exposure.

## Acknowledgements

This project has been supported by the Department of Urology, Stony Brook University Hospital and General Clinical research Center grant # 5-MO1-RR-10710.

## References

- Brindley GS (1982) Deep scrotal temperature and the effect of clothing, air temperature, activity, posture and paraplegia. *Br J Urol* 54,49–55.
- Brown-Woodman PD, Post EJ, Glass GC and White IG (1984) The effect of a single sauna exposure on spermatozoa. *Arch Androl* 12,9–15.

- Bujan L, Daudin M, Charlet JP, Thonneau P and Mieusset R (2000) Increase in scrotal temperature in car drivers. *Hum Reprod* 15,1355–1357.
- Carlsen E, Giwercman A, Keiding N and Skakkebaek NE (1992) Evidence for decreasing quality of semen during past 50 years. *Br Med J* 305, 609–613.
- Dada R, Gupta NP and Kucheria K (2003) Spermatogenic arrest in men with testicular hyperthermia. *Teratogen Carcinogen Mutagen (Suppl 1)*, 235–243.
- Figa-Talamanca I, Dell'Orco V, Pupi A et al. (1992) Fertility and semen quality of workers exposed to high temperatures in the ceramics industry. *Reprod Toxicol* 6,517–523.
- Fisch H, Goluboff ET, Olson JH, Feldshuh J, Broder SJ and Barad DH (1996) Semen analyses in 1,283 men from the United States over a 25-year period: no decline in quality. *Fertil Steril* 65,1009–1014.
- Gilbaugh JH and Lipshultz LI (1994) Nonsurgical treatment of male infertility. *Urol Clin N Amer* 21,531–548.
- Goldstein M and Eid JF (1989) Elevation of Intratesticular and scrotal skin surface temperature in men with varicocele. *J Urol* 142,743–745.
- Hjollund NHI, Bonde JPE, Jensen TK and Olsen J (2000) Diurnal scrotal skin temperature and semen quality. *Int J Androl* 23,309–318.
- Hjollund NHI, Storgaard L, Ernst E, Bonde JP and Olsen J (2002a) The relationship between daily activities and scrotal temperature. *Hum Reprod* 16,209–214.
- Hjollund NHI, Storgaard L, Ernst E, Bonde JP and Olsen J (2002b) Impact of diurnal scrotal temperature on semen quality. *Hum Reprod* 16, 215–221.
- Jegou B, Auger J, Multinger L et al. (1999) The saga of the sperm count decrease in humans, wild and farm animals. In Gagnon C (ed.) *The Male Gamete, from Basic Science to Clinical Applications*. Cache River Press, USA, pp. 445–454.
- Jung A, Schill WB and Schuppe HC (2002) Genital heat stress in men of barren couples: a prospective evaluation by means of a questionnaire. *Andrologia* 34,349–355.
- Kandeel FR and Swerdloff RS (1988) Role of temperature in regulation of spermatogenesis and the use of heating as a method for contraception. *Fertil Steril* 49,1–49.
- Kapadia RM and Phadke AM (1955) Scrotal suspenders and subfertility. *J Fam Welf* 2,27.
- Kitayama T (1965) Study on testicular temperature in men. *Hinjokika Kiyu* 11,435–465.
- Kurz KR and Goldstein M (1986) Scrotal Temperature reflects Intratesticular temperature and is lowered by shaving. *J Urol* 135,290–292.
- Lerchl A and Nieschlag E (1996) Decreasing sperm counts? A critical review. *Exp Clin Endocrinol Diabetes* 104,301–307.
- Lerchl A, Keck C, Spiteri-Grech J and Nieschlag E (1993) Diurnal variations in scrotal temperature of normal men and patients with varicocele before and after treatment. *Int J Androl* 16,195–200.
- MacLeod J (1951) Effect of chicken pox and pneumonia on semen quality. *Fertil Steril* 2,523–533.
- Mieusset R and Bujan L (1995) Testicular heating and its possible contribution to male infertility: a review. *Int J Androl* 18,169–184.
- Mieusset R, Grandjean H, Mansat A and Pontonnier F (1985) Inhibiting effect of artificial cryptorchidism on spermatogenesis. *Fertil Steril* 43, 589–594.
- Mieusset R, Quintana-Casares P, Sanchez-Partida LG et al. (1992) Effects of heating the testes and epididymides of rams by scrotal insulation on fertility and embryonic mortality in ewes inseminated with frozen semen. *J Reprod Fert* 94,337–343.
- Mills RG (1919) The pathological changes in the testes in epidemic pneumonia. *J Exp Med* 30,505–528.
- Nistal M and Paniagua R (1984) Infertility in adult males with retractile testes. *Fertil Steril* 41,395–403.
- Olsen GW, Bodner KM and Ramlow JM (1995) Have sperm counts been reduced 50 percent in 50 years? A statistical model revisited. *Fertil Steril* 63,887–893.
- Ostenson C-G (2002) Lap burn due to laptop computer. *Lancet* 360,1704.
- Partsch C-J, Aukamp M and Sippell WG (2000) Scrotal temperature is increased in disposable plastic lined nappies. *Arch Dis Child* 83,364–368.
- Procope BJ (1965) Effect of repeated increase of body temperature on human sperm cells. *Int J Fertil* 10,333–339.
- Rozati R, Reddy PP, Reddanna P and Mujtaba R (2002) Role of environmental estrogens in the deterioration of male factor fertility. *Fertil Steril* 78, 1187–1194.
- Robinson D and Rock J (1967) Intrascrotal hyperthermia induced by scrotal insulation: effect on spermatogenesis. *Obstet Gynecol* 2,217–223.
- Robinson D, Rock J and Menkin MF (1968) Control of Human Spermatogenesis by Induced Changes of Intrascrotal Temperature. *JAMA* 204, 80–87.
- Rock J and Robinson D (1965) Effect of induced intrascrotal hyperthermia on testicular function in man. *Am J Obstet Gynecol* 93,793–801.
- Rübben H, Recker F and Lutze W (1986) Exogene Wärmeexposition—eine Ursache der Subfertilität. *Urologe* 25,67–68.
- Saikhun J, Kitiyanant Y, Vanadurongwan V and Pavasuthipaisit K (1999) Effects of sauna on sperm movement characteristics of normal men measured by computer-assisted sperm analysis. *Int J Androl* 6,358–363.
- Shafik A (1991) Testicular suspension as a method of male contraception: technique and results. *Adv Contracept Deliv Syst* 7,269–279.
- Swan SH, Elkin EP and Fenster L (1997) Have sperm densities declined? A reanalysis of global trend data. *Env Health Perspect* 105,1228–1232.
- Thonneau P, Bujan L, Multinger L and Mieusset R (1998) Occupational heat exposure and male fertility: a review. *Hum Reprod* 13,2122–2125.
- Toppari J, Latsen JC, Christiansen P et al. (1996) Male reproductive function and environmental xenoestrogens. *Environ Health Perspect* 104,741–803.
- Wang C, McDonald V, Leung A et al. (1997) Effect of increased scrotal temperature on sperm production in normal men. *Fertil Steril* 68,334–339.
- Wright EJ, Young GPH and Goldstein M (1997) Reduction in testicular temperature after varicolectomy in infertile men. *Urology* 2,257–259.
- Zorgniotti AW and MacLeod J (1973) Studies in temperature, human semen quality and varicocele. *Fertil Steril* 24,854–863.

Submitted on May 4, 2004; resubmitted on September 27, 2004; accepted on October 21, 2004
